# Supplementary material for: Effect of Blending Dimethyl Carbonate and Ethanol with Gasoline on Combustion Characteristics
Source: MDPI journal article supplement (doi:10.3390/fuels4040027), 2023-10-26
Supplement: s1 [file s1]

## **Supplementary Material**

# **Effect of Blending Dimethyl Carbonate and Ethanol with Gasoline on Combustion Characteristics**

**Shunsuke Suzuki <sup>1</sup>, Eiichi Takahashi <sup>2</sup>, Mitsuharu Oguma <sup>1</sup> and Kazuhiro Akihama <sup>2</sup>**

<sup>1</sup> Research Institute for Energy Conversion, National Institute of Advanced Industrial Science and Technology (AIST), 1-2-1 Namiki, Tsukuba 305-8564, Ibaraki, Japan

<sup>2</sup> Department of Sustainable Engineering, College of Industrial Technology, Nihon University, 1-2-1, Izumi-cho, Narashino 275-8575, Chiba, Japan

# 1. Properties of fuels used in this study.

Table S1. Properties of DMC/gasoline blends.

|                                   | Gasoline | DMC20%<br>/Gasoline80% | DMC40%<br>/Gasoline60% | DMC60%<br>/Gasoline40% | DMC   |
|-----------------------------------|----------|------------------------|------------------------|------------------------|-------|
| RON                               | 92.2     | 94.3                   | 98.4                   | 108.0                  | 121.0 |
| MON                               | 82.4     | 85.6                   | 90.0                   | 98.8                   | 102.5 |
| Density@15°C [g/cm <sup>3</sup> ] | 0.7323   | 0.7987                 | 0.8679                 | 0.9379                 | 1.076 |
| Vapor pressure@15°C [kPa]         | 58.07    | 59.8                   | 55.5                   | 47.9                   | 13.5  |
| Total heating value [kJ/g]        | 46.09    | 37.94                  | 31.11                  | 25.15                  | 16.11 |
| Elemental analysis                |          |                        |                        |                        |       |
| C [mass%]                         | 86.5     | -                      | 63.0                   | -                      | 40.2  |
| H [mass%]                         | 13.5     | -                      | 10.1                   | -                      | 6.8   |
| O [mass%]                         | 0.00     | -                      | 26.4                   | -                      | 49.3  |

Table S2. Properties of ethanol/gasoline blends.

|                                   | Gasoline | Ethanol20%<br>/Gasoline80% | Ethanol40%<br>/Gasoline60% | Ethanol60%<br>/Gasoline40% | Ethanol |
|-----------------------------------|----------|----------------------------|----------------------------|----------------------------|---------|
| RON                               | 92.2     | 95.3                       | 98.2                       | 101.2                      | 106.0   |
| MON                               | 82.4     | 84.6                       | 86.6                       | 88.6                       | 91.9    |
| Density@15°C [g/cm <sup>3</sup> ] | 0.7323   | 0.7471                     | 0.7587                     | 0.7710                     | 0.7945  |
| Vapor pressure@15°C [kPa]         | 58.07    | 41.27                      | 32.76                      | 25.82                      | 16.14   |
| Total heating value [kJ/g]        | 46.09    | 42.13                      | 38.53                      | 35.20                      | 29.85   |
| Elemental analysis                |          |                            |                            |                            |         |
| C [mass%]                         | 86.5     | 78.3                       | 70.6                       | 63.6                       | 52.4    |
| H [mass%]                         | 13.5     | 13.4                       | 13.3                       | 13.3                       | 13.1    |
| O [mass%]                         | 0.00     | 8.4                        | 16.1                       | 23.2                       | 34.5    |
